# Supplementary material for: Ni–Co–O hole transport materials: gap state assisted hole extraction with superior electrical conductivity
Source: Royal Society of Chemistry journal article supplement (doi:10.1039/c9ta07331k), 2019-01-01
Supplement: c9ta07331k1.pdf [file c9ta07331k1.pdf]

## Supplementary Information

---

### **Ni-Co-O hole transport materials: gap states assisted hole extraction with enhanced electrical conductivity**

Yu Hou,<sup>†a</sup> Li Juan Tang,<sup>†a</sup> Hong Wei Qiao,<sup>a</sup> Zi Ren Zhou,<sup>a</sup> Yu Lin Zhong,<sup>c</sup> Li Rong Zheng,<sup>d</sup> Meng Jiong Chen,<sup>a</sup> Shuang Yang,<sup>\*b</sup> Hua Gui Yang<sup>\*a</sup>

*<sup>a</sup>Key Laboratory for Ultrafine Materials of Ministry of Education, School of Materials Science and Engineering, East China University of Science and Technology, 130 Meilong Road, Shanghai 200237, China*

*<sup>b</sup>Key Laboratory for Liquid-Solid Structural Evolution and Processing of Materials, Ministry of Education, School of Materials Science and Engineering, Shandong University, Jinan, 250061, P. R. China*

*<sup>c</sup>Centre for Clean Environment and Energy, Gold Coast Campus, Griffith University, Queensland 4222, Australia*

*<sup>d</sup>Beijing Synchrotron Radiation Facility, Institute of High Energy Physics, Chinese Academy of Sciences, Beijing, 100049, China*

<sup>†</sup>These authors contributed equally to this work.

Correspondence and requests for materials should be addressed to Shang Yang ([syang@sdu.edu.cn](mailto:syang@sdu.edu.cn)) and Hua Gui Yang ([hgyang@ecust.edu.cn](mailto:hgyang@ecust.edu.cn)).

## Methods

**Substrate treatment.** The patterned FTO-coated glass substrates were cleaned using ultrasonication in detergent, acetone, ethanol and deionized water, and then dried at 80 °C, followed by UV ozone treatment for 15 min.

**Preparation of Ni-Co-O films.** Typically, 0.05925 g  $\text{NiCl}_2 \cdot 6\text{H}_2\text{O}$ , 0.1185 g  $\text{CoCl}_2 \cdot 6\text{H}_2\text{O}$  and 0.21 g citric acid monohydrate were dissolved into 3.5 mL N, N-Dimethylformamide (DMF, 99.9%, Alfa Aesar) under constant magnetic stirring to form a clear solution<sup>1</sup>. Different precursor solutions for Co content were prepared by dissolving different quantities of  $\text{NiCl}_2 \cdot 6\text{H}_2\text{O}$  and  $\text{CoCl}_2 \cdot 6\text{H}_2\text{O}$  with the total concentration of metal ions to be 0.214 M. The solutions were then spin-coated onto FTO at 4000 rpm for 60 s, followed by heated at 100 °C for 10 min, after cooling to room temperature, the films were calcined at 400 °C for 1 h.

**Synthesis of methylammonium iodide ( $\text{CH}_3\text{NH}_3\text{I}$ ).** The  $\text{CH}_3\text{NH}_3\text{I}$  was prepared according to a reported method<sup>2</sup>.  $\text{CH}_3\text{NH}_3\text{I}$  was synthesized by reacting 27.86 mL methylamine (40% in ethanol, Sigma-Aldrich) and 30 mL hydroiodic acid (57 wt% in water, Sigma-Aldrich) in a 250 mL round-bottomed flask at 0 °C for 2 h with stirring. The precipitate was recovered by evaporation at 50 °C for 1 h. The product was dissolved in ethanol, recrystallized from diethyl ether and dried at 60 °C in a vacuum oven for 12 h. The white powder was collected and stored under argon atmosphere before use.

**Device Fabrication.**  $\text{PbI}_2$  (DMSO) complex solution in DMF was prepared by mixing 0.5993 g  $\text{PbI}_2$  (99.9985%, Alfa Aesar), 92  $\mu\text{L}$  dimethylsulfoxide (DMSO, 99.9%, Sigma-Aldrich), 1 mL DMF with stirring at room-temperature overnight. The  $\text{PbI}_2$  (DMSO) solution was spin-coated on hole transport layers (HTLs) at 3000 rpm for 30 s, and then MAI solution (60 mg/mL in 2-propanol) was spin-coated on the top of the transparent  $\text{PbI}_2$  (DMSO) film at 5000 rpm for 30 s. The films changed to dark brown during spin coating and the films were dried on a hot plate at 100 °C for 10 min. Then, PCBM (20 mg/mL in chlorobenzene) and BCP (0.5 mg/mL in ethanol) were deposited

by spin coating at 2000 rpm for 45 s, and 4000 rpm for 45 respectively. Finally, 110 nm of Ag was thermally evaporated as the back electrode.

**Characterization.** The morphology and structure of the HTLs were characterized by field emission scanning electron microscopy (FESEM, HITACHI S4800). The X-ray diffraction (XRD) spectra of the prepared HTLs were measured using powder XRD (Bruker D8 Advanced Diffractometer, Cu K $\alpha$  radiation, 40kV). X-ray photoelectron spectroscopy (XPS, PHI5300, Mg anode, 250 W, 14 kV) was used to analyze the elemental composition of the HTLs. The work functions were measured by ultraviolet photoelectron spectrum (UPS) with He source of incident energy of 21.21 eV (He I line). The transmittance spectra of HTLs and the absorption spectra of the perovskite were measured by using a Cary 500 UV-Vis-NIR Spectrophotometer. The photoluminescence measurement was acquired at room temperature with a UV-Vis-NIR fluorescence spectrophotometer (Fluorolog-3-P) with an excitation wavelength of 515 nm. The solar cells were illuminated using a solar light simulator (Solar IV-150A, Zolix) and the power of the simulated light was calibrated to 100 mW cm<sup>-2</sup> using a Newport calibrated KG5-filtered Si reference cell. *J-V* curves of solar cells were measured using a Keithley 2400 digital sourcemeter. Devices were masked with a metal aperture to define the active area to be 0.0625 cm<sup>2</sup>. The steady state current output of the best-performing devices was measured by biasing the device at maximum power point for 100 s. The external quantum efficiency (EQE) was measured using a Newport-74125 system (Newport Instruments). The electrochemical impedance spectroscopy (EIS) was carried out on Electrochemical Workstation (Parstat 2273, Princeton) in the frequency range between 1 MHz and 100 Hz under short circuit at different bias. XAFS measurements were performed at the beam line 1W1B in Beijing Synchrotron Radiation Facility, China.

## Supplementary Figures

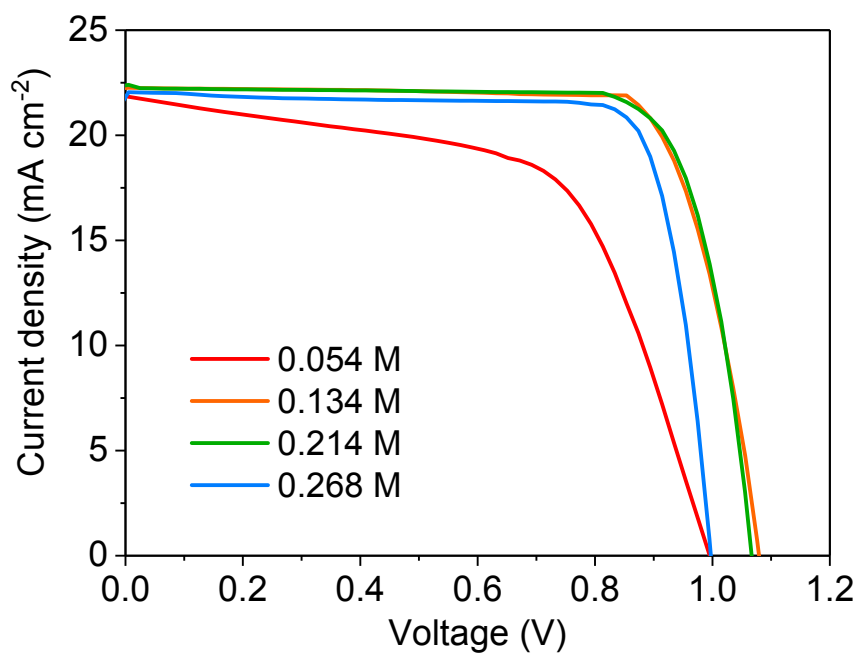

**Fig. S1** *J-V* curve of the NiCoO<sub>x</sub> based device recorded at a scan rate of 0.15 V s<sup>-1</sup>. The concentration of all metal ions in precursor is 0.214 M.

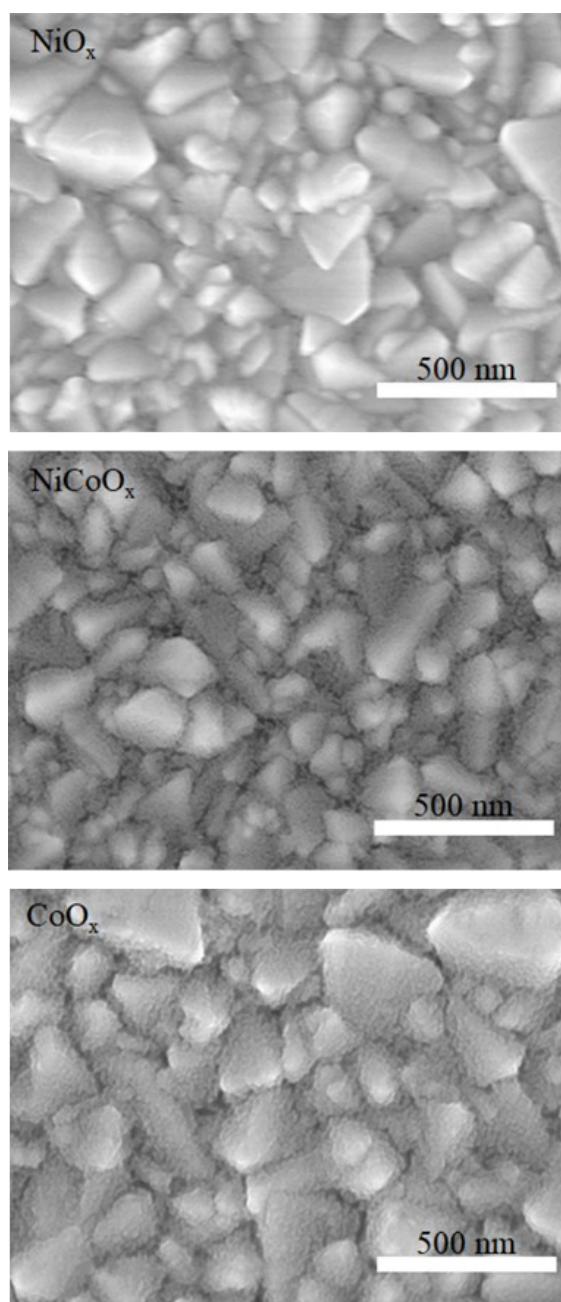

**Fig. S2** Top-view SEM micrographs of  $\text{NiO}_x$ ,  $\text{NiCoO}_x$  and  $\text{CoO}_x$  layers deposited on FTO/glass. All films show essentially compact morphologies with full coverage of the FTO surface.

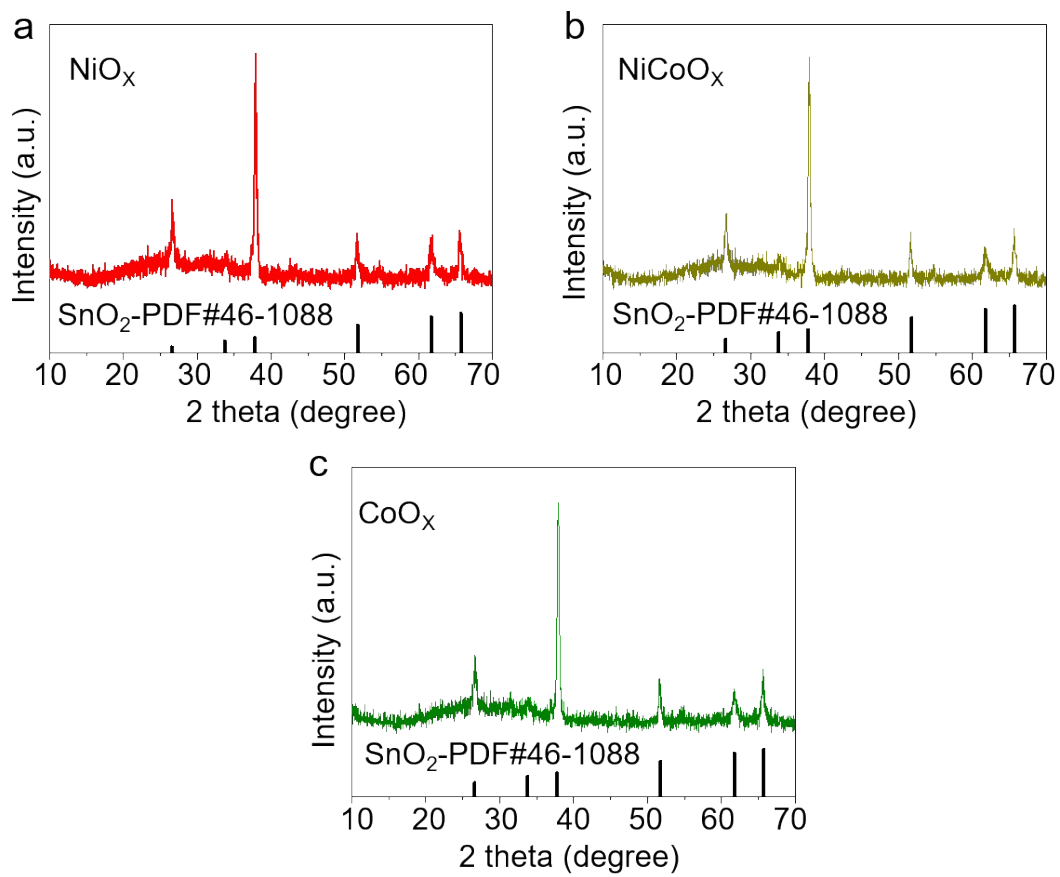

**Fig. S3** XRD pattern of NiO<sub>x</sub>, NiCoO<sub>x</sub> and CoO<sub>x</sub> films deposited on FTO/glass.

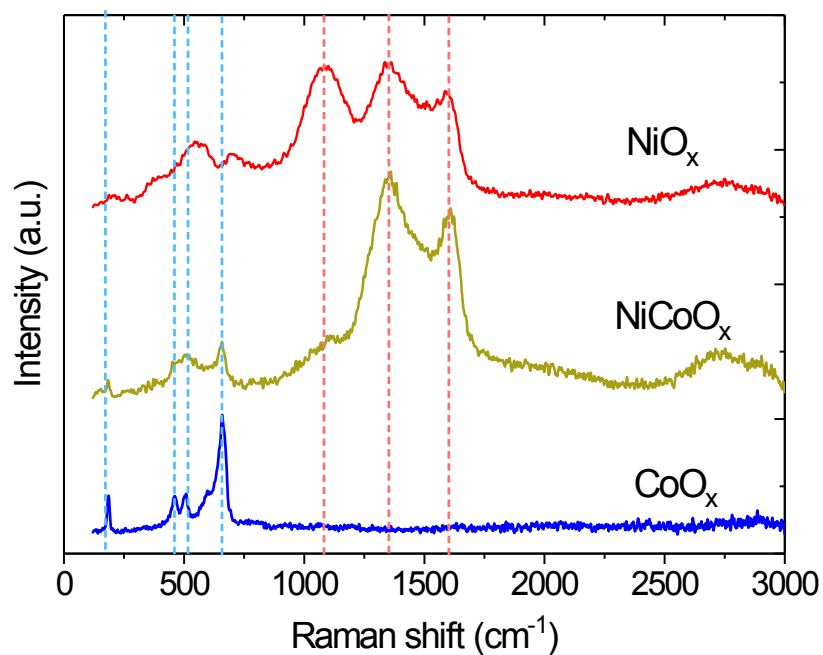

**Fig. S4** Raman spectra of NiO<sub>x</sub>, NiCoO<sub>x</sub> and CoO<sub>x</sub> films. The NiO<sub>x</sub> film shows three Raman bands at 1076, 1351 and 1606 cm<sup>-1</sup>, while the CoO<sub>x</sub> presents four Raman active bands at 189, 455, 513 and 660 cm<sup>-1</sup>. The NiCoO<sub>x</sub> film displays the typical Raman bands of both films, indicating their structural similarity.

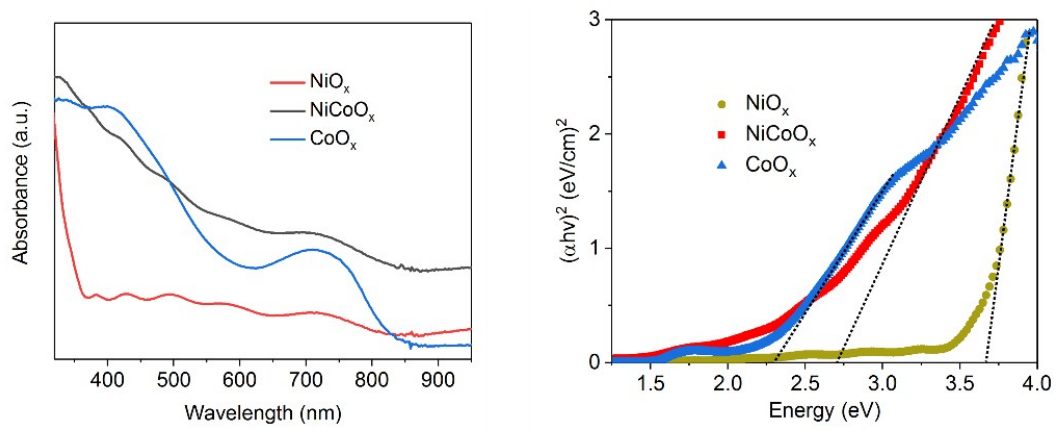

**Fig. S5** UV-vis spectra (left) and Tauc plots (right) of NiO<sub>x</sub>, NiCoO<sub>x</sub> and CoO<sub>x</sub> films.



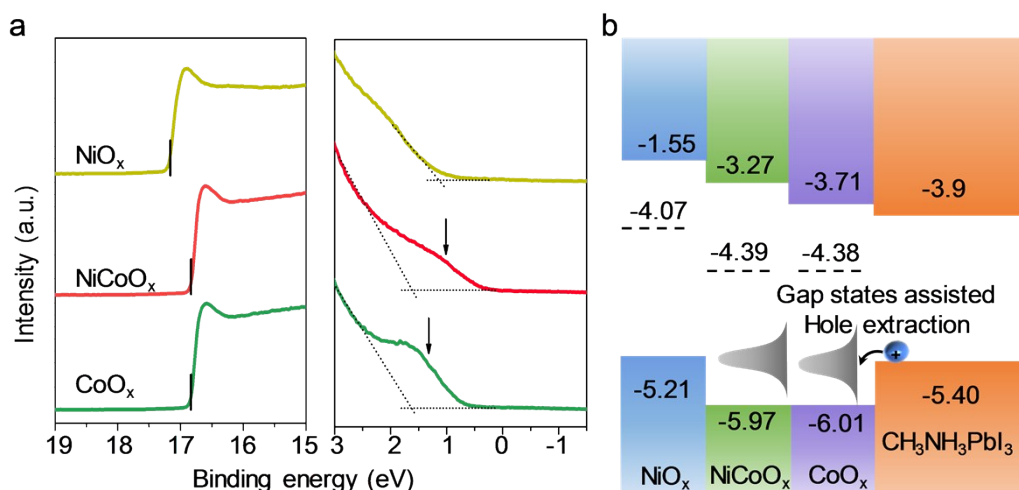

**Fig. S6** (a) UPS spectra of the cut-off ( $E_{\text{cut-off}}$ ) energy boundary (left) and valence band (VB) structure (right) of the NiO<sub>x</sub>, NiCoO<sub>x</sub> and CoO<sub>x</sub> films. All samples were deposited on FTO substrates. The VB tails (right figure) indicated by arrows are gap states within the bandgap of NiCoO<sub>x</sub> and CoO<sub>x</sub> films. (b) Energy-level diagrams of the HTLs and perovskite (relative to the vacuum level). The dashed line shows the fermi level of the hole conducting materials deposited on FTO glass determined by UPS measurements. The occurrence of gap states in NiCoO<sub>x</sub> and CoO<sub>x</sub> could provide electronic pathways for hole transfer from perovskites.

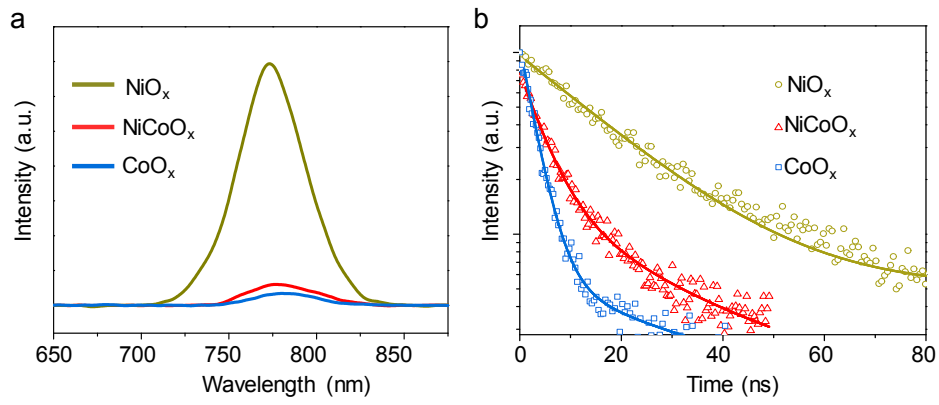

**Fig. S7** (a) steady-state and (b) time-resolved photoluminescence (TRPL) decay of perovskite films with different HTLs.

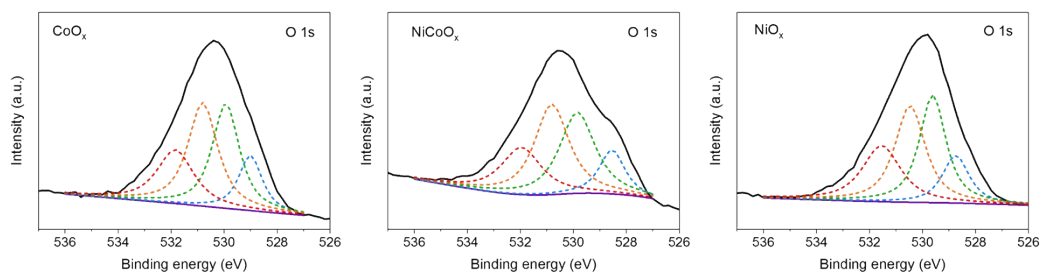

**Fig. S8** O 1s XPS spectra of  $\text{NiO}_x$ ,  $\text{NiCoO}_x$  and  $\text{CoO}_x$ . The black and purple solid lines are raw XPS data and background, respectively. The dotted curves are the fitting of experimental data, which can be divided into O1 (red dotted line), O2 (orange dotted line), O3 (green dotted line) and O4 (blue dotted line) for all samples.

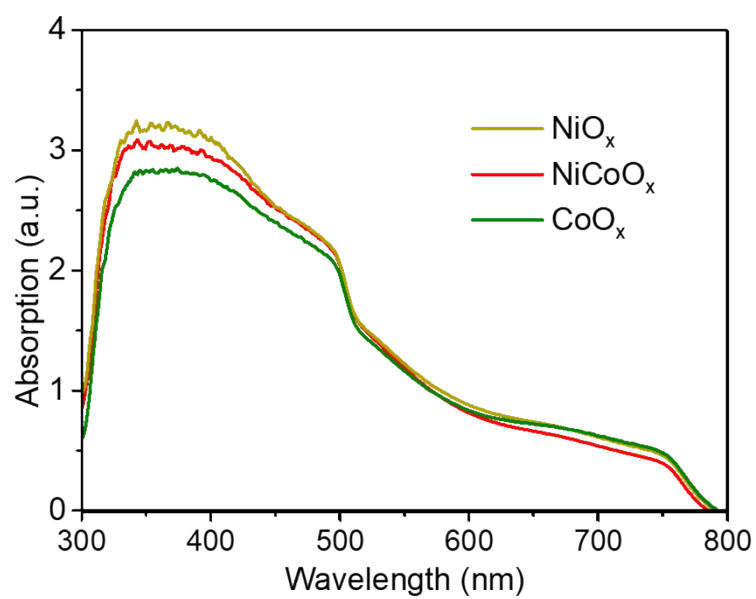

**Fig. S9** Spectral absorbance of the perovskite films based on NiO<sub>x</sub>, NiCoO<sub>x</sub> and CoO<sub>x</sub> HTLs, showing their similar light absorbance efficiency between 300-800 nm.

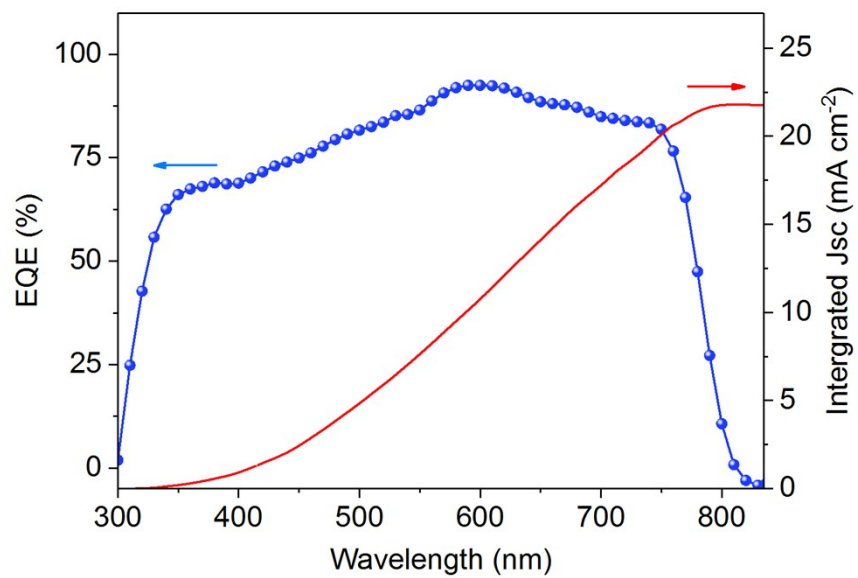

**Fig. S10** EQE spectra for a typical perovskite solar cell based on NiCoO<sub>x</sub> HTLs.

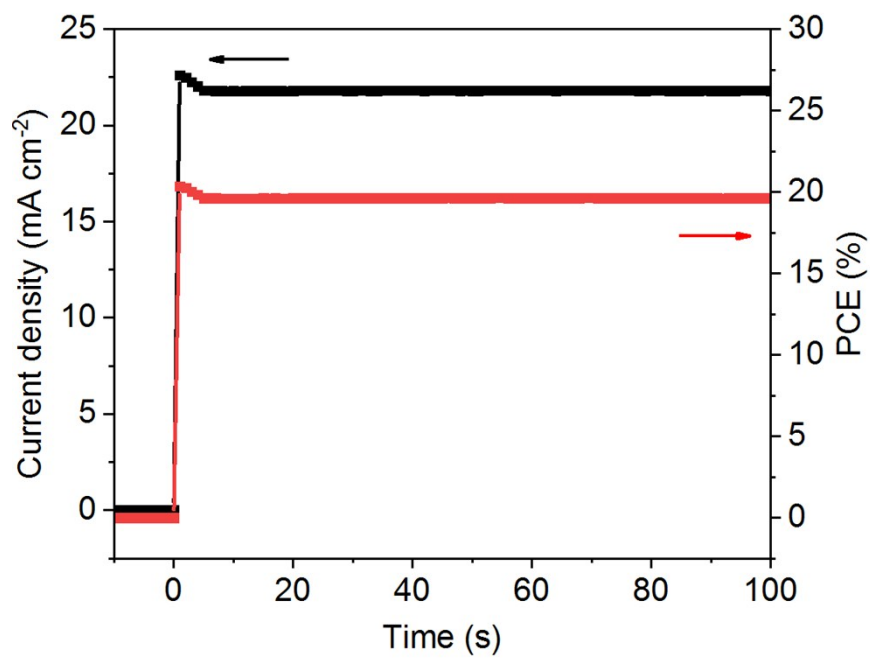

**Fig. S11** Steady-state photocurrent and power output at maximum power point (MPP).

**Table S1.** Photovoltaic parameters of PSCs based on NiCoO<sub>x</sub> films with different Co contents.

| NiCoO <sub>x</sub> (Co contents) |         | $J_{SC}$ (mA/cm <sup>2</sup> ) | $V_{OC}$ (V) | FF    | PCE(%) |
|----------------------------------|---------|--------------------------------|--------------|-------|--------|
| 0%                               | Highest | 22.71                          | 1.035        | 0.730 | 17.14  |
|                                  | Average | 22.66                          | 1.038        | 0.699 | 16.48  |
| 25%                              | Highest | 21.95                          | 1.045        | 0.780 | 17.89  |
|                                  | Average | 21.96                          | 1.039        | 0.768 | 17.53  |
| 50%                              | Highest | 22.27                          | 1.080        | 0.833 | 20.03  |
|                                  | Average | 22.09                          | 1.068        | 0.785 | 18.51  |
| 75%                              | Highest | 22.40                          | 0.960        | 0.800 | 17.12  |
|                                  | Average | 22.29                          | 0.943        | 0.769 | 16.17  |
| 100%                             | Highest | 21.65                          | 0.987        | 0.465 | 9.95   |
|                                  | Average | 20.55                          | 0.974        | 0.452 | 9.04   |

## References

- [1] Chen, S., Yang, G., Jia, Y. & Zheng, H., Three-dimensional NiCo<sub>2</sub>O<sub>4</sub>@NiWO<sub>4</sub> core-shell nanowire arrays for high performance supercapacitors. *J. Mater. Chem. A* **5**, 1028-1034 (2017).
- [2] Hou, Y. *et al.* A band-edge potential gradient heterostructure to enhance electron extraction efficiency of the electron transport layer in high-performance perovskite solar cells. *Adv. Funct. Mater.* **27**, 1700878 (2017).
